# Supplementary material for: Structural Analysis of Interactions between Epidermal Growth Factor Receptor (EGFR) Mutants and Their Inhibitors
Source: MDPI journal article supplement (doi:10.3390/biophysica3010013), 2023-03-14
Supplement: s1 [file s1]

Archive with 1 entries (1 files):
- biophysica-2138998-supplementary.pdf
