# Supplementary material for: Structural Analysis of Interactions between Epidermal Growth Factor Receptor (EGFR) Mutants and Their Inhibitors
Source: MDPI journal article supplement (doi:10.3390/biophysica3010013), 2023-03-14
Supplement: s1 [file s1 › biophysica-2138998-supplementary.pdf]

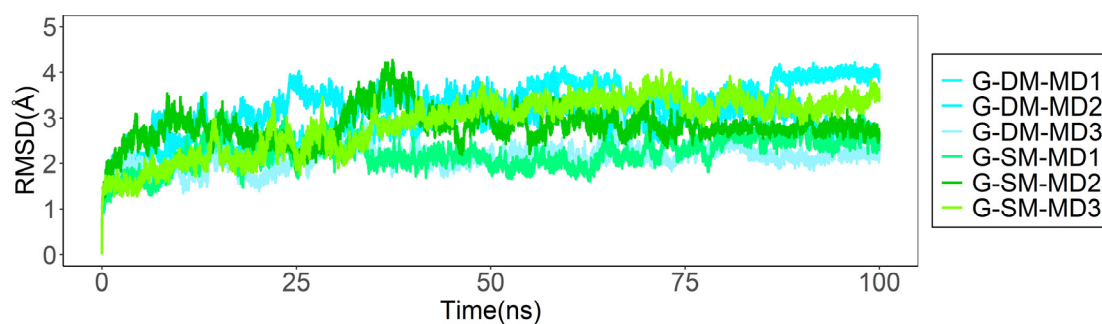

**Figure S1.** RMSD values for each 100 ns MD trajectory in the G-SM and G-DM system with three replicas.

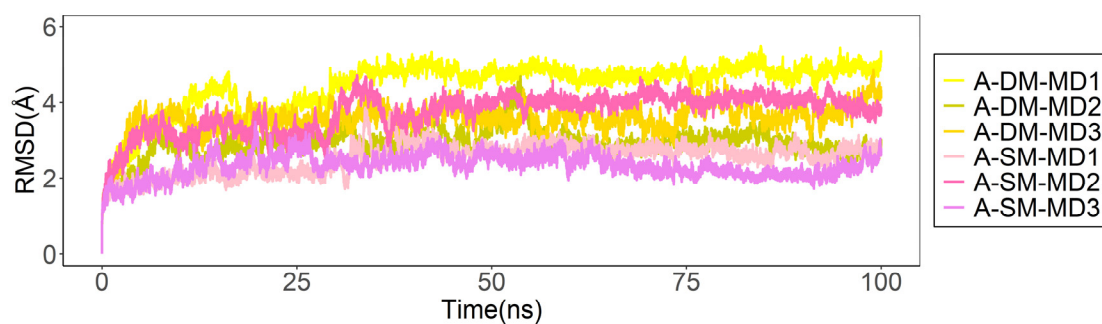

**Figure S2.** RMSD values for each 100 ns MD trajectory in the A-SM and A-DM system with three replicas.

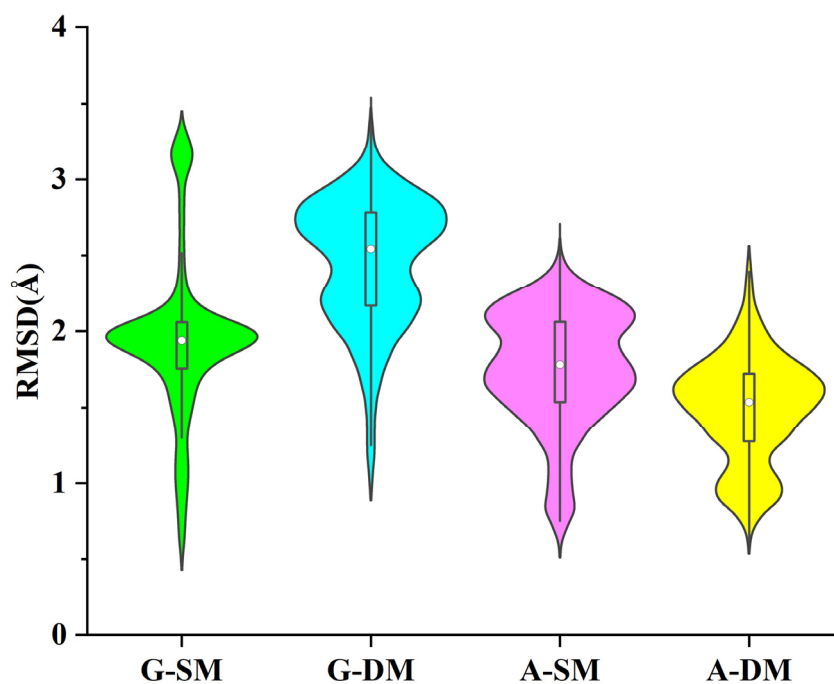

**Figure S3.** RMSD values for Gefitinib in the G-SM (green), and G-DM (cyan) system, Afatinib in the A-SM (pink), and A-DM (yellow) system.
